# Supplementary material for: Single Nucleotide Variations in CLCN6 Identified in Patients with Benign Partial Epilepsies in Infancy and/or Febrile Seizures
Source: PubMed Central journal article supplement (PMC4368117; doi:10.1371/journal.pone.0118946), 2015-03-20
Supplement: pone.0118946.s004.pdf [file pone.0118946.s004.pdf]

**Table S1. Primers used for *CLCN6* Sanger sequencing**

|            | Forward                    |     | Reverse                     |     | Predicted PCR sizes |
|------------|----------------------------|-----|-----------------------------|-----|---------------------|
| exon 1     | 5'- AGCCACTCCTGGTCTCAGTC   | -3' | 5'- GTAGACGCTTCGAGAGCCC     | -3' | 365                 |
| exon 2     | 5'- TTTAGAAGCTAGCCACTGATTC | -3' | 5'- AATCATAATGCTTCGGCCTG    | -3' | 228                 |
| exon 3     | 5'- TCCACACGTTGAGTAGCAGG   | -3' | 5'- TGCCTGTATCGCATGAAAAG    | -3' | 286                 |
| exon 4     | 5'- GCCAAGATGTATTTCTTCCCC  | -3' | 5'- ACCAGGCCAGGGCTTTC       | -3' | 210                 |
| exon 5     | 5'- GATGCCTTCAAGAGGAGCAC   | -3' | 5'- GAATAGCTAATAAGCGGCC     | -3' | 269                 |
| exon 6     | 5'- CTGCACCCTCTCAAGTGATG   | -3' | 5'- AACAAGAGGCCACTTTCTGC    | -3' | 304                 |
| exon 7     | 5'- CCAGATTGTTGAGGGTAAGCC  | -3' | 5'- GGCCCTGCAGTCCAAATC      | -3' | 294                 |
| exon 8     | 5'- TTCAGTTGTCACGAGGAAGG   | -3' | 5'- ATTTGGCCCAGTGTAACCAG    | -3' | 234                 |
| exon 9     | 5'- AGTCCTAGGCTGCCCTG      | -3' | 5'- GGGATACTGCCAGGCTAGAG    | -3' | 270                 |
| exon 10    | 5'- CAGAAACCACCTTTTGGGG    | -3' | 5'- GTACCGAGTAAGGGACACCC    | -3' | 267                 |
| exon 11    | 5'- AGGAGGAAGGGTTGGGAG     | -3' | 5'- CTGCTCATTCTCTCTGGTCC    | -3' | 270                 |
| exon 12    | 5'- CTCTTGCTTCTGTCTTCTCTTC | -3' | 5'- CTCCTCGGGAGAGATGGCG     | -3' | 333                 |
| exon 13    | 5'- CTGCTGTGAATGCTGTTTGGAG | -3' | 5'- GGAAGGATGAACCCAACATATC  | -3' | 350                 |
| exon 14    | 5'- TGGACCCGGCTGGAGACATC   | -3' | 5'- ACACCAATCACCCACGATTG    | -3' | 273                 |
| exon 15/16 | 5'- GGAAGTGGTATGGGGTGTGG   | -3' | 5'- GTCCATTTGGCCACCTGAAAC   | -3' | 713                 |
| exon 17    | 5'- CTGTCAGGCTCAGGGCCAC    | -3' | 5'- GTTACTGTTTCTACCCTAATAAC | -3' | 262                 |
| exon 18    | 5'- AGGGCTGGAGAGCCAGCAC    | -3' | 5'- GATGAGAACAGTGCCAACCTCC  | -3' | 400                 |
| exon 19    | 5'- CATTGTAACCACCAGCCTGAG  | -3' | 5'- GAAACTCAGGAGCCACCTCAC   | -3' | 415                 |
| exon 20    | 5'- GGCTCAGATGTTGTGAGGTGG  | -3' | 5'- CCTATGGCACTGTTACGGC     | -3' | 375                 |
| exon 21/22 | 5'- TGGGCATATTCAGGCATCAAGG | -3' | 5'- ACGGAAGCCGAGCAGGGTTC    | -3' | 573                 |
| exon 23    | 5'- TCAAGCTGTGTCTGGCTGTGC  | -3' | 5'- GTGTCCGATGACTCCCGGC     | -3' | 355                 |

All primers are designed in the flanking intronic regions with at least 50 bp distance from exon/intron boundaries.
