# Supplementary material for: Single Nucleotide Variations in CLCN6 Identified in Patients with Benign Partial Epilepsies in Infancy and/or Febrile Seizures
Source: PubMed Central journal article supplement (PMC4368117; doi:10.1371/journal.pone.0118946), 2015-03-20
Supplement: pone.0118946.s005.pdf [file pone.0118946.s005.pdf]

**Table S2. The result of the mapping of whole exome sequencing data for family 1**

| Sample ID                                             | I-1           | II-2          | II-3          | II-4          | III-1         | Average       |
|-------------------------------------------------------|---------------|---------------|---------------|---------------|---------------|---------------|
| Mapped reads                                          | 180,881,812   | 211,837,042   | 165,146,156   | 166,414,396   | 158,612,804   | 181,069,852   |
| Properly mapped reads                                 | 154,903,712   | 178,276,062   | 141,274,362   | 145,747,992   | 135,367,788   | 155,050,532   |
| Total bases mapped                                    | 9,208,978,584 | 9,846,484,671 | 8,655,706,841 | 8,696,717,122 | 9,669,779,910 | 9,101,971,805 |
| Total bases uniquely mapped<br>(w/o duplicate reads)  | 4,930,351,738 | 6,352,622,514 | 6,001,427,793 | 5,189,537,228 | 5,095,590,495 | 5,618,484,818 |
| Total bases mapping to target <sup>*1</sup>           | 2,409,199,406 | 4,094,923,264 | 2,451,038,966 | 3,198,637,153 | 3,323,511,309 | 3,038,449,697 |
| Mean target <sup>*1</sup> coverage                    | 53.2          | 91.3          | 54.2          | 71.0          | 73.9          | 67.4          |
| % target <sup>*1</sup> bases with $\geq 10X$ coverage | 86.85%        | 85.76%        | 85.10%        | 85.47%        | 85.21%        | 85.80%        |
| Mean target <sup>*2</sup> coverage                    | 56.0          | 96.9          | 57.0          | 75.4          | 78.3          | 71.3          |
| % target <sup>*2</sup> bases with $\geq 10X$ coverage | 84.21%        | 83.39%        | 82.83%        | 82.79%        | 83.25%        | 83.30%        |

\*1: SureSelect bait, \*2: RefSeq CDS
